# Supplementary material for: Antibiofilm Effect of Lavandula multifida Essential Oil: A New Approach for Chronic Infections
Source: MDPI journal article supplement (doi:10.3390/pharmaceutics15082142), 2023-08-15
Supplement: s1 [file s1]

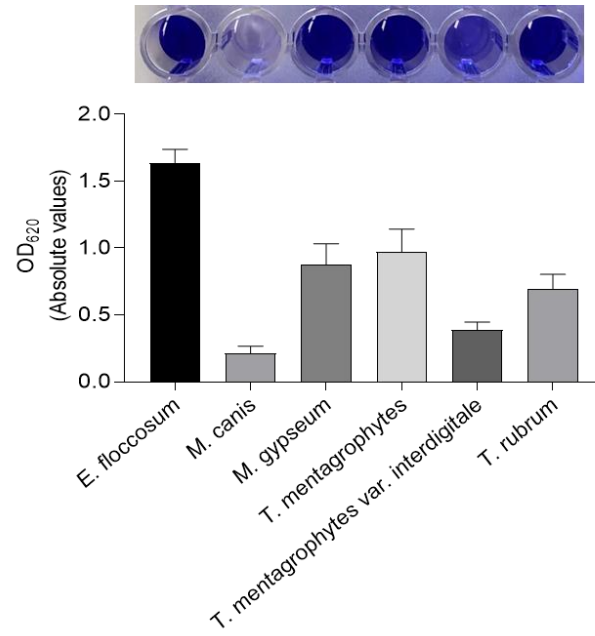

**Figure S1.** Dermatophytes biofilm biomass assessed by crystal violet assay. Dermatophytes were left to adhere for 3h and further incubated for 72h in culture medium. Values represent the mean  $\pm$  SEM of the optical density at 620 nm of at least three independent assays.
